# Supplementary material for: Dexamethasone-loaded platelet-inspired nanoparticles improve intracortical microelectrode recording performance
Source: Research Square preprint supplement (doi:10.21203/rs.3.rs-6018202/v1), 2025-02-14
Supplement: Supplementary file 1 [file 98e6e93b70872a05b31cb8af.docx]

# Supplementary Materials

# Materials and Method Section:

## Immunohistochemistry Antibodies Information

Table S1. Immunohistochemistry Antibodies

| Target Antigen | 1st Antibody | Dilution | 2nd Antibody | Dilution |
| --- | --- | --- | --- | --- |
| Neuronal Nuclei (NeuN) | Mouse anti-NeuN, Millipore Sigma, MAB3477 | 1:250 | Goat anti-mouse AF488, Invitrogen, A32723 | 1:1000 |
| Activated Macrophage/Microglia (CD68) | Mouse anti-CD68, Millipore Sigma, MAB1435 | 1:100 | Goat anti-mouse AF488, Invitrogen, A32723 | 1:1000 |
| Glial Fibrillary Acidic Protein (GFAP) | Rabbit anti-GFAP, Agilent Dako, Z0334429-2 | 1:500 | Goat anti-mouse AF488, Invitrogen, A32723 | 1:1000 |
| Immunoglobulin (IgG) | Rabbit anti-IgG, Bio-Rad, 618501 | 1:100 | Goat anti-rabbit AF488, Invitrogen, A32731 | 1:1000 |

# Results Section

## Full Statistical Comparison for IHC Analysis:

Statistical significance was represented as ns = non-significant, * = p < 0.05, ** = p < 0.01, *** = p < 0.001 and **** = p < 0.0001 for all tables in this section.

Table S2. Sub-chronic study statistical comparison for NeuN

|  | SPPINDEX  vs. PIN | SPPINDEX  vs. TH | SPPINDEX vs.  Free DEXSP | PIN  vs. TH | PIN vs.  TH | TH vs.  Free DEXSP |
| --- | --- | --- | --- | --- | --- | --- |
| 0-50 µm | *** | **** | **** | ns | ns | ns |
| 50-100 µm | ** | *** | *** | ns | ns | ns |
| 100-150 µm | ns | * | *** | ns | ns | ns |
| 150-200 µm | ns | ns | ns | ns | ns | ns |
| 200-250 µm | ns | ns | ns | ns | ns | ns |
| 250-300 µm | ns | ns | ns | ns | ns | ns |
| 300-350 µm | ns | ns | ns | ns | ns | ns |
| 350-400 µm | ns | ns | ns | ns | ns | ns |
| 400-450 µm | ns | ns | ns | ns | ns | ns |
| 450-500 µm | ns | ns | ns | ns | ns | ns |
| 500-550 µm | ns | ns | ns | ns | ns | ns |
| 550-600 µm | ns | ns | ns | ns | ns | ns |

Table S3. Sub-chronic study statistical comparison for CD68

|  | SPPINDEX  vs. PIN | SPPINDEX  vs. TH | SPPINDEX vs.  Free DEXSP | PIN  vs. TH | PIN vs.  TH | TH vs.  Free DEXSP |
| --- | --- | --- | --- | --- | --- | --- |
| 0-50 µm | * | * | **** | ns | * | * |
| 50-100 µm | ns | ns | **** | ns | *** | **** |
| 100-150 µm | ns | ns | **** | ns | *** | **** |
| 150-200 µm | ns | ns | **** | ns | ** | **** |
| 200-250 µm | ns | ns | *** | ns | ** | *** |
| 250-300 µm | ns | ns | ** | ns | * | ** |
| 300-350 µm | ns | ns | ** | ns | * | *** |
| 350-400 µm | ns | ns | ** | ns | ns | *** |
| 400-450 µm | ns | ns | ** | ns | ns | **** |
| 450-500 µm | ns | ns | ** | ns | * | *** |
| 500-550 µm | ns | ns | * | ns | ns | ** |
| 550-600 µm | ns | ns | ns | ns | ns | ns |

Table S4. Sub-chronic study statistical comparison for GFAP

|  | SPPINDEX  vs. PIN | SPPINDEX  vs. TH | SPPINDEX vs.  Free DEXSP | PIN  vs. TH | PIN vs.  TH | TH vs.  Free DEXSP |
| --- | --- | --- | --- | --- | --- | --- |
| 0-50 µm | ns | ** | **** | * | **** | ns |
| 50-100 µm | ns | * | ** | ns | * | ns |
| 100-150 µm | ns | ns | ** | ns | * | ns |
| 150-200 µm | ns | ns | ** | ns | * | ns |
| 200-250 µm | ns | ns | ** | ns | * | ns |
| 250-300 µm | ns | ns | ** | ns | * | ns |
| 300-350 µm | ns | ns | *** | ns | ** | ns |
| 350-400 µm | ns | ns | *** | ns | *** | ns |
| 400-450 µm | ns | ns | ** | ns | ** | ns |
| 450-500 µm | ns | ns | * | ns | ns | ns |
| 500-550 µm | ns | ns | ns | ns | ns | ns |
| 550-600 µm | ns | ns | ns | ns | ns | ns |

Table S5. Sub-chronic study statistical comparison for IgG

|  | SPPINDEX  vs. PIN | SPPINDEX  vs. TH | SPPINDEX vs.  Free DEXSP | PIN  vs. TH | PIN vs.  TH | TH vs.  Free DEXSP |
| --- | --- | --- | --- | --- | --- | --- |
| 0-50 µm | ns | * | ns | ns | ns | ns |
| 50-100 µm | ns | *** | ns | * | ns | ns |
| 100-150 µm | ns | *** | ns | ** | ns | ns |
| 150-200 µm | ns | *** | ns | ** | ns | ns |
| 200-250 µm | ns | ** | ns | *** | * | ns |
| 250-300 µm | ns | ** | ns | **** | ** | ns |
| 300-350 µm | ns | ** | ns | **** | ** | ns |
| 350-400 µm | ns | * | ns | **** | *** | ns |
| 400-450 µm | ns | * | ns | *** | ** | ns |
| 450-500 µm | ns | * | * | ** | ** | ns |
| 500-550 µm | ns | * | * | ** | *** | ns |
| 550-600 µm | ns | ns | * | ** | *** | ns |

## Measurement of Creatinine Levels

Table S6. Creatinine Levels Summary

| Animal ID | Treatment | Week 0 | Week 4 | Week 8 |
| --- | --- | --- | --- | --- |
| CS12 | SPPINDEX | < 0.2 | 0.2 | 0.2 |
| CS13 | SPPINDEX | < 0.2 | 0.2 | < 0.2 |
| CS14 | SPPINDEX | 0.3 | 0.2 | 0.2 |
| CS22 | SPPINDEX | 0.2 | 0.2 | 0.3 |
| CS23 | SPPINDEX | 0.2 | 0.2 | 0.2 |
| CS24 | SPPINDEX | < 0.2 | 0.2 | 0.2 |
| CS25 | SPPINDEX | 0.2 | 0.2 | 0.2 |
| CS18 | Free DEXSP | < 0.2 | 0.2 | 0.2 |
| CS29 | Free DEXSP | 0.2 | 0.2 | 0.2 |
| CS32 | Free DEXSP | < 0.2 | 0.2 | 0.2 |
| CS42 | Free DEXSP | 0.3 | 0.2 | < 0.2 |
| CS43 | Free DEXSP | 0.2 | 0.2 | 0.2 |
| CS48 | Free DEXSP | < 0.2 | 0.2 | 0.2 |
| CS49 | Free DEXSP | 0.2 | 0.2 | 0.2 |
| CS50 | Free DEXSP | 0.2 | 0.2 | 0.2 |
| CS15 | PIN | < 0.2 | 0.2 | 0.2 |
| CS16 | PIN | 0.2 | 0.2 | 0.2 |
| CS17 | PIN | < 0.2 | 0.2 | 0.2 |
| CS40 | PIN | < 0.2 | 0.3 | 0.2 |
| CS45 | PIN | < 0.2 | 0.2 | 0.2 |
| CS46 | PIN | 0.2 | 0.2 | 0.3 |
| CS47 | PIN | 0.2 | 0.2 | 0.2 |
| CS9 | TH | 0.2 | 0.2 | 0.2 |
| CS11 | TH | * | 0.2 | 0.2 |
| CS19 | TH | 0.2 | 0.2 | 0.4 |
| CS21 | TH | < 0.2 | 0.2 | 0.3 |
| CS26 | TH | < 0.2 | 0.2 | < 0.2 |
| CS27 | TH | < 0.2 | 0.2 | 0.3 |
| CS28 | TH | 0.2 | 0.2 | 0.2 |

“*” MISSING: failed to collect blood samples or analysis errors.
